# Supplementary material for: The impact of irrigation on yield of alfalfa and soil chemical properties of saline-sodic soils
Source: PeerJ. 2019 Jul 10;7:e7148. doi: 10.7717/peerj.7148 (PMC6626524; doi:10.7717/peerj.7148)
Supplement: Supplemental Information 1 — The data of meteorology, bio-charateristics, yield, WUE, WC, WSI, and soil chemical properties. [file peerj-07-7148-s001.xlsx]

## Sheet: bio-parameters
	T	SH(cm)	SPAD	DM-A（g/m2）	SLR	WC (mm)	WUE(kg/m3)	DW-J（g/m2）	Irrigation(mm)		WSI	λ1	λ2	λ3
8	CK	52.6667	48.3	79	3.8	85.4917	0.924067	299.874	0	1	CK	1.70953	3.1319	1.59543
8	CK	55	46.9667	118	1.27688	85.4917	1.38025	299.874	0	1	CK	1.26822	3.1319	1.59543
8	CK	57.6667	64.7333	145	1.34815	85.4917	1.69607	299.874	0	1	CK	0.996496	2.46087	1.2536
7	I7	122.333	64.6333	1740	2.42515	809.528	2.1494	1913.33	643.945	2	I7	0.109463	0.270322	0.137705
7	I7	123.333	66.6667	1520	2.34063	716.158	2.12244	1913.33	550.575	2	I7	0.0181536	0.0448308	0.0228374
7	I7	125.667	63.3	1850	3.08519	674.663	2.74211	1913.33	509.08	2	I7	0.0667495	0.164839	0.0839712
6	I6	101.667	66.7	620	3.1728	285.397	2.17242	461.924	170.905	3	I6	0.610515	1.50768	0.768031
6	I6	109.333	56.1667	700	1.75847	293.557	2.38455	461.924	179.065	3	I6	0.551588	1.36216	0.693901
6	I6	101	61.0333	580	1.79215	285.277	2.03311	461.924	170.785	3	I6	0.642897	1.58765	0.808768
5	I5	118	67.1	900	2.12793	327.192	2.75068	1187.43	195.2	4	I5	0.429562	1.06081	0.540391
5	I5	111.667	60.8667	700	1.75847	307.832	2.27397	1187.43	175.84	4	I5	0.551588	1.36216	0.693901
5	I5	116.667	51.1667	760	1.72104	308.422	2.46416	1187.43	176.43	4	I5	0.511657	1.26355	0.643667
4	I4	109.333	61.8333	760	2.13281	324.918	2.33905	736.012	198.21	5	I4	0.451636	1.11533	0.568161
4	I4	92.6667	62.3333	720	2.01472	299.638	2.4029	736.012	172.93	5	I4	0.41889	1.03446	0.526966
4	I4	94	68.6667	460	2.10307	291.808	1.57638	736.012	165.1	5	I4	0.755449	1.8656	0.950359
3	I3	119	67.0667	760		412.908	1.8406	1829.11	307.625	6	I3	0.511657	1.26355	0.643667
3	I3	107.667	54.9	980	1.4323	357.648	2.74012	1829.11	252.365	6	I3	0.25854	0.638471	0.325245
3	I3	103.333	58.6667	880	2.90556	389.198	2.26106	1829.11	283.915	6	I3	0.440473	1.08776	0.554118
2	I2	109.333	55.9667	960	2.35626	336.995	2.84871	458.769	225.72	7	I2	0.398225	0.983426	0.500969
2	I2	113.667	59.8333	1080	2.43644	462.605	2.33461	458.769	351.33	7	I2	0.341035	0.842194	0.429024
2	I2	107.667	60.8667	900	1.92406	432.855	2.07922	458.769	321.58	7	I2	0.429562	1.06081	0.540391
1	I1	115.333	64.1	985	2.57696	364.45	2.7027	1133.75	248.025	8	I1	0.368788	0.910732	0.463938
1	I1	111	56.5667	885	1.98964	432.745	2.04508	1133.75	316.32	8	I1	0.266187	0.657354	0.334864
1	I1	103	53.9667	990	1.59949	373.35	2.65167	1133.75	256.925	8	I1	0.378404	0.934477	0.476034

## Sheet: Sheet3
		average	Std.E	Label
sh	1	109.778	3.61239	bc
	2	110.222	1.78816	bc
	3	110	4.67063	bc
	4	98.6667	5.3472	d
	5	115.444	1.92771	ab
	6	104	2.6736	cd
	7	123.778	0.98758	a
	8	55.1111	1.44444	e
spad
	2	58.8889	1.49125	a
	3	60.2111	3.59611	a
	4	64.2778	2.19919	a
	5	59.7111	4.6357	a
	6	61.3	3.04363	a
	7	64.8667	0.97885	a
	8	53.3333	5.71298	a
dm	1	953.333	34.1971	b
	2	980	52.915	b
	3	873.333	63.596	b
	4	646.667	94.0449	c
	5	786.667	59.2546	c
	6	633.333	35.2767	c
	7	1703.33	97.0109	a
	8	114	19.1572	d
slr	1	2.0554	0.28408	a
	2	2.2389	0.15912	a
	3	2.1689	0.73663	a
	4	2.0835	0.03546	a
	5	1.8691	0.12984	a
	6	2.2411	0.46593	a
	7	2.617	0.23537	a
	8	2.1417	0.82942	a
wc	1	390.182	21.4362	b
	2	410.818	37.8976	b
	3	386.585	16.0056	b
	4	305.455	9.99072	c
	5	314.482	6.35728	c
	6	288.077	2.74022	c
	7	733.45	39.8806	a
	8	85.4917	0	d
wue	1	2.4665	0.21121	a
	2	2.4208	0.22628	a
	3	2.2806	0.25985	a
	4	2.1061	0.26551	a
	5	2.4963	0.13855	a
	6	2.1967	0.10217	a
	7	2.338	0.20221	a
	8	1.3335	0.22408	b
WSI	R	0.5202	0.07577	b
	B	1.2393	0.1596	a
	F	0.6313	0.0813	b

## Sheet: soil chemical properties
Ph
I1	2017	2015	I2	2017	2015	I3	2017	2015	I4	2017	2015	I5	2017	2015	I6	2017	2015	I7	2017	2015	CK	2017	2015
10	8.48083	8.64667	10	8.103	8.64667	10	8.16	8.64667	10	8.13	8.64667	10	8.069	8.64667	10	8.4	8.64667	10	8.631	8.64667	10	8.3	8.64667
30	9.29143	9.365	30	8.78	9.365	30	8.964	9.365	30	8.566	9.365	30	8.662	9.365	30	9.22333	9.365	30	9.22	9.365	30	9.0025	9.365
50	9.45714	8.89333	50	9.034	8.89333	50	9.028	8.89333	50	9.02	8.89333	50	9.026	8.89333	50	9.39167	8.89333	50	9.382	8.89333	50	9.245	8.89333
70	9.41286	9.13833	70	9.102	9.13833	70	9.194	9.13833	70	9.058	9.13833	70	9.108	9.13833	70	9.31	9.13833	70	9.266	9.13833	70	9.2325	9.13833
90	9.20143	9.205	90	9.044	9.205	90	9.21	9.205	90	8.974	9.205	90	8.914	9.205	90	9.22167	9.205	90	9.026	9.205	90	9.19	9.205
	9.16874	9.04967		8.8126	9.04967		8.9112	9.04967		8.7496	9.04967		8.7558	9.04967		9.10933	9.04967		9.105	9.04967		8.994	9.04967
	0.119071			-0.237067						-0.300067			-0.293867			0.0596667			0.0553333			-0.0556667
TA
I1	2017	2015	I2	2017	2015	I3	2017	2015	I4	2017	2015	I5	2017	2015	I6	2017	2015	I7	2017	2015	CK	2017	2015
10	2.55714	2.62222	10	2.93	2.62222	10	2.78	2.62222	10	2.92	2.62222	10	2.28	2.62222	10	2.55	2.62222	10	2.6	2.62222	10	3.3	2.62222
30	3.33333	6.3	30	3.86	6.3	30	3.24	6.3	30	3.9	6.3	30	3.4	6.3	30	3.3	6.3	30	3.05	6.3	30	5.05	6.3
50	3.76667	10.5333	50	3.54	10.5333	50	5.14	10.5333	50	4.33333	10.5333	50	3.46667	10.5333	50	3.2	10.5333	50	3.4	10.5333	50	5.1	10.5333
70	5.02857	10.4	70	3.74	10.4	70	5	10.4	70	4.05	10.4	70	4.44	10.4	70	3.33333	10.4	70	2.7	10.4	70	5	10.4
90	4.73333	8.33333	90	4.2	8.33333	90	5.6	8.33333	90	4.6	8.33333	90	3.875	8.33333	90	4.4	8.33333	90	3.2	8.33333	90	5.33333	8.33333
	3.88381	7.63778	50	3.654	7.63778	50	4.352	7.63778	50	3.96067	7.63778	50	3.49233	7.63778	50	3.35667	7.63778	50	2.99	7.63778	50	4.75667	7.63778
	-3.75397			-3.98378			-3.28578			-3.67711			-4.14544
EC
I1	2017	2015	I2	2017	2015	I3	2017	2015	I4	2017	2015	I5	2017	2015	I6	2017	2015	I7	2017	2015	CK	2017	2015
10	147.786	236.45	10	101.51	236.45	10	208.81	236.45	10	102.89	236.45	10	112.36	236.45	10	136.3	236.45	10	134.467	236.45	10	153	236.45
30	330.9	388.667	30	336.82	388.667	30	243.42	388.667	30	268.06	388.667	30	230.56	388.667	30	365.333	388.667	30	316.54	388.667	30	385.55	388.667
50	436.471	614.433	50	343.18	614.433	50	436.64	614.433	50	420.7	614.433	50	379.46	614.433	50	427.283	614.433	50	452.3	614.433	50	673.725	614.433
70	410.414	728	70	349.42	728	70	324.48	728	70	275.24	728	70	304.24	728	70	350.45	728	70	317.1	728	70	642.725	728
90	330.286	739.333	90	374.46	739.333	90	272.74	739.333	90	220.56	739.333	90	244.04	739.333	90	294.5	739.333	90	221	739.333	90	620.125	739.333
	331.171	541.377	50	301.078	541.377	50	297.218	541.377	50	257.49	541.377	50	254.132	541.377	50	314.773	541.377	50	288.281	541.377	50	495.025	541.377
soil chemical properties 2015-2017, depth of 0~100cm
